# Supplementary material for: Incidence of venous thromboembolism in Korea from 2009 to 2013
Source: PubMed Central journal article supplement (PMC5785001; doi:10.1371/journal.pone.0191897), 2018-01-25
Supplement: pone.0191897.s003.pdf [file pone.0191897.s003.pdf]

S1 Table. Proportion of anticoagulative treatment over the study period (2009 to 2013)

| Year                                                                        | %    |      |      |      |      |      |      |      |      |      |      |      |      |      |      |
|-----------------------------------------------------------------------------|------|------|------|------|------|------|------|------|------|------|------|------|------|------|------|
|                                                                             | 2009 |      |      | 2010 |      |      | 2011 |      |      | 2012 |      |      | 2013 |      |      |
|                                                                             | VTE  | DVT  | PE   | VTE  | DVT  | PE   | VTE  | DVT  | PE   | VTE  | DVT  | PE   | VTE  | DVT  | PE   |
| Types of anticoagulation used (within 3 months after the time of diagnosis) |      |      |      |      |      |      |      |      |      |      |      |      |      |      |      |
| UFH alone                                                                   | 8.5  | 7.3  | 9.2  | 7.6  | 7.7  | 7.6  | 7.1  | 6.4  | 7.7  | 8.6  | 5.3  | 10.9 | 5.8  | 4.0  | 7.2  |
| LMWH-based                                                                  |      |      |      |      |      |      |      |      |      |      |      |      |      |      |      |
| LMWH alone                                                                  | 15.5 | 18.7 | 13.5 | 15.9 | 18.9 | 14.1 | 17.2 | 21.3 | 14.4 | 18.9 | 25.9 | 14.2 | 16.2 | 18.9 | 14.2 |
| UFH→LMWH                                                                    | 7.0  | 7.8  | 6.5  | 6.9  | 8.0  | 6.3  | 7.6  | 9.6  | 6.2  | 7.0  | 7.2  | 6.8  | 6.2  | 5.8  | 6.6  |
| Warfarin-based                                                              |      |      |      |      |      |      |      |      |      |      |      |      |      |      |      |
| UFH→Warfarin                                                                | 19.5 | 18.6 | 20.1 | 17.5 | 16.3 | 18.2 | 16.9 | 15.6 | 17.8 | 14.5 | 13.5 | 15.2 | 11.2 | 8.7  | 13.2 |
| LMWH→Warfarin                                                               | 31.0 | 30.6 | 31.2 | 32.1 | 29.8 | 33.4 | 31.4 | 28.8 | 33.2 | 31.3 | 29.9 | 32.2 | 20.2 | 15.6 | 23.7 |
| UFH and (↔) LMWH→Warfarin                                                   | 18.5 | 17.1 | 19.5 | 19.9 | 19.4 | 20.3 | 19.8 | 18.4 | 20.7 | 18.1 | 16.9 | 18.9 | 11.1 | 8.2  | 13.4 |
| Rivaroxaban based                                                           |      |      |      |      |      |      |      |      |      |      |      |      |      |      |      |
| Rivaroxaban alone                                                           | 0.0  | 0.0  | 0.0  | 0.0  | 0.0  | 0.0  | 0.0  | 0.0  | 0.0  | 0.6  | 0.0  | 1.0  | 12.3 | 20.6 | 5.9  |
| UFH→Rivaroxaban                                                             | 0.0  | 0.0  | 0.0  | 0.0  | 0.0  | 0.0  | 0.0  | 0.0  | 0.0  | 0.0  | 0.1  | 0.0  | 2.9  | 3.7  | 2.2  |
| LMWH→Rivaroxaban                                                            | 0.0  | 0.0  | 0.0  | 0.0  | 0.0  | 0.0  | 0.0  | 0.0  | 0.0  | 0.1  | 0.1  | 0.1  | 4.0  | 4.3  | 3.8  |
| UFH↔LMWH→Rivaroxaban                                                        | 0.0  | 0.0  | 0.0  | 0.0  | 0.0  | 0.0  | 0.0  | 0.0  | 0.0  | 0.0  | 0.1  | 0.0  | 2.3  | 2.5  | 2.2  |
| Rivaroxaban and warfarin                                                    |      |      |      |      |      |      |      |      |      |      |      |      |      |      |      |
| Rivaroxaban↔Warfarin                                                        | 0.0  | 0.0  | 0.0  | 0.0  | 0.0  | 0.0  | 0.0  | 0.0  | 0.0  | 0.0  | 0.0  | 0.0  | 1.0  | 1.5  | 0.7  |
| UFH→Rivaroxaban↔Warfarin                                                    | 0.0  | 0.0  | 0.0  | 0.0  | 0.0  | 0.0  | 0.0  | 0.0  | 0.0  | 0.2  | 0.3  | 0.1  | 1.5  | 1.5  | 1.5  |
| LMWH→Rivaroxaban↔Warfarin                                                   | 0.0  | 0.0  | 0.0  | 0.0  | 0.0  | 0.0  | 0.0  | 0.0  | 0.0  | 0.4  | 0.5  | 0.3  | 2.8  | 2.7  | 3.0  |
| UFH↔LMWH→Rivaroxaban↔Warfarin                                               | 0.0  | 0.0  | 0.0  | 0.0  | 0.0  | 0.0  | 0.0  | 0.0  | 0.0  | 0.3  | 0.3  | 0.3  | 2.4  | 2.2  | 2.5  |
| Total (%)                                                                   | 100  | 100  | 100  | 100  | 100  | 100  | 100  | 100  | 100  | 100  | 100  | 100  | 100  | 100  | 100  |

VTE, venous thromboembolism; DVT, deep vein thrombosis; PE, pulmonary embolism; UFH, unfractionated heparin; LMWH, low-molecular-weight heparin
